# Supplementary material
Source: PubMed Central journal article supplement (PMC5577807)

Figure S1

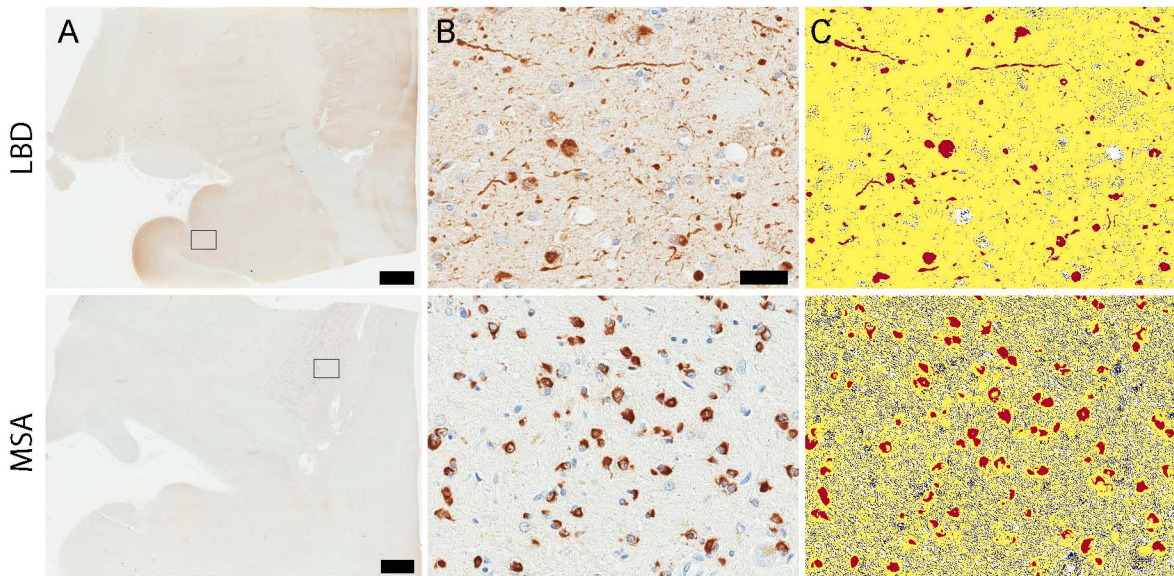

Figure S2

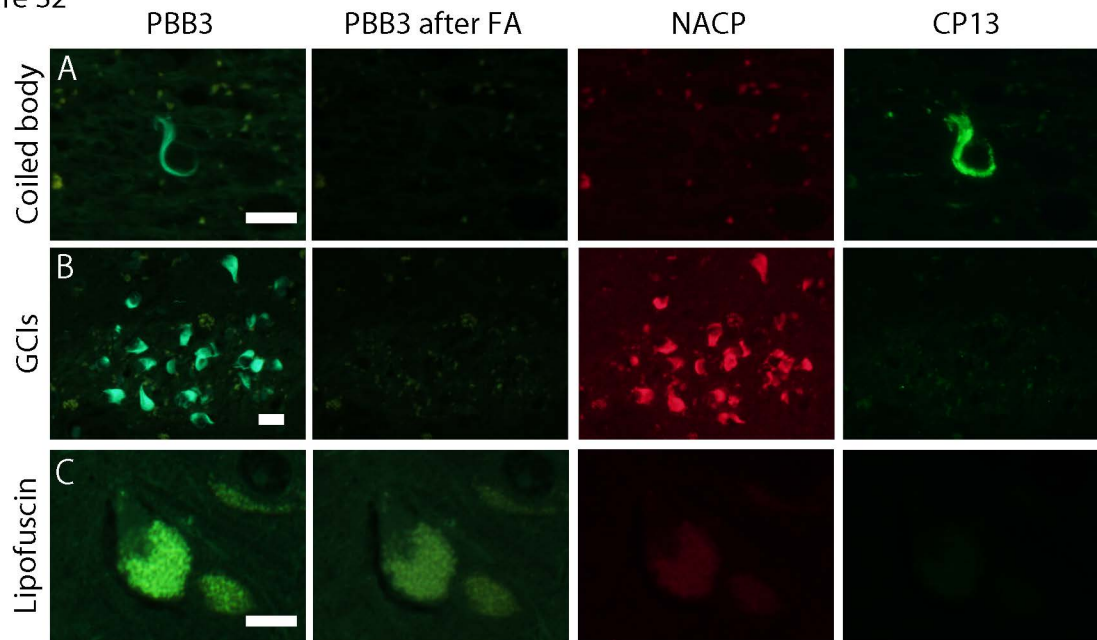

Figure S3

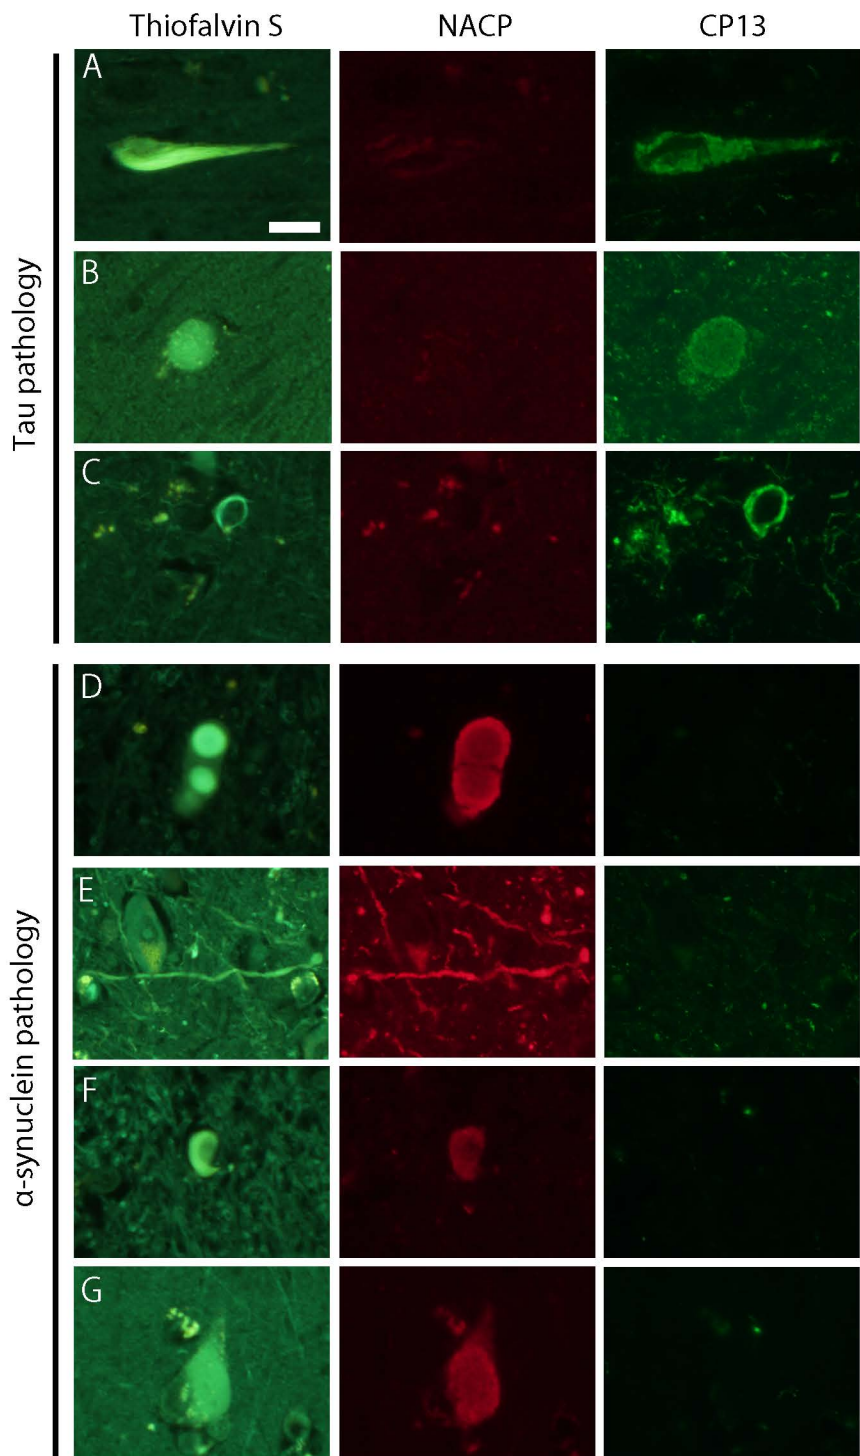

Figure S4

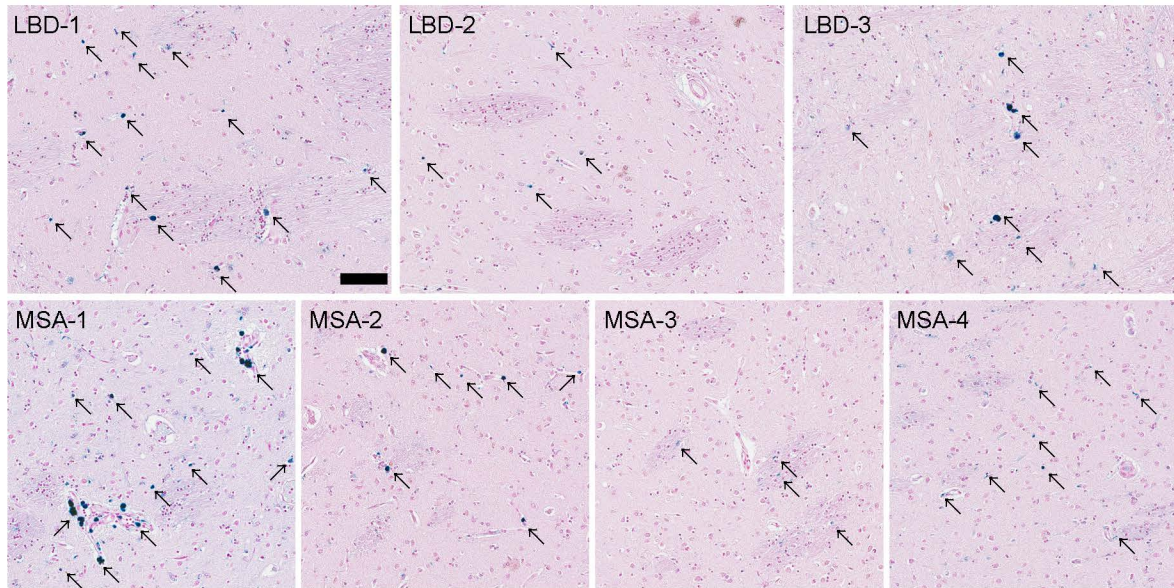

Supplement: NIHMS862412-supplement-Supp_Fig_S1-4.pdf [file NIHMS862412-supplement-Supp_Fig_S1-4.pdf]
